# Supplementary material for: Ionic crosslinked polypropylene-based thermoplastic elastomers with excellent mechanical properties
Source: Royal Society of Chemistry journal article supplement (doi:10.1039/d4py00372a), 2024-01-01
Supplement: d4py00372a1.pdf [file d4py00372a1.pdf]

## Supporting Information

# Ionic Crosslinked Polypropylene-based Thermoplastic Elastomers with Excellent Mechanical Properties

Xiaohui Mao, Fei Wang, Li Pan,\* Zhe Ma, and Yuesheng Li\*

Tianjin Key Laboratory of Composite and Functional Materials, and School of Materials Science and Engineering, Tianjin University, Tianjin 300072, P.R. China

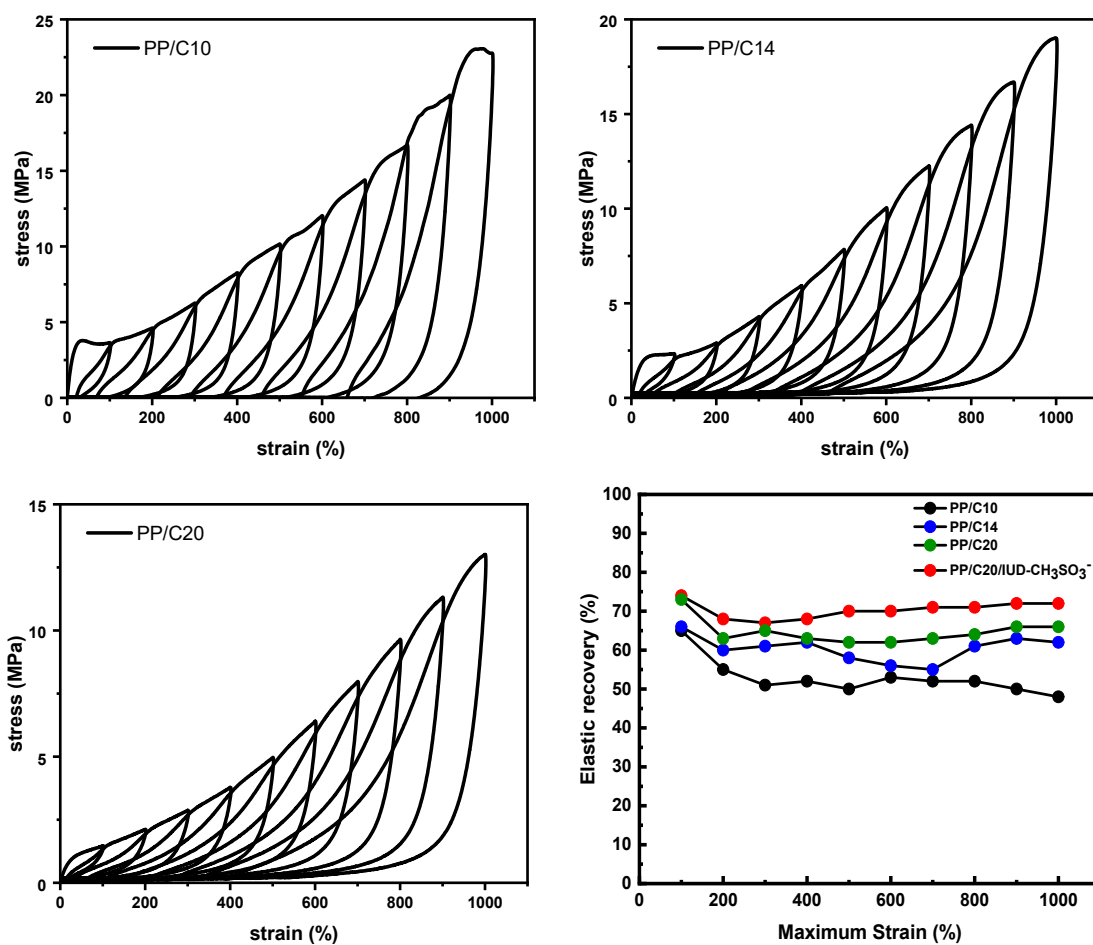

Figure S1. Elastic recovery (%) of PP/C10 (SR = 52.6%), PP/C14 (SR = 60.4%), PP/C20 (SR = 64.7%).

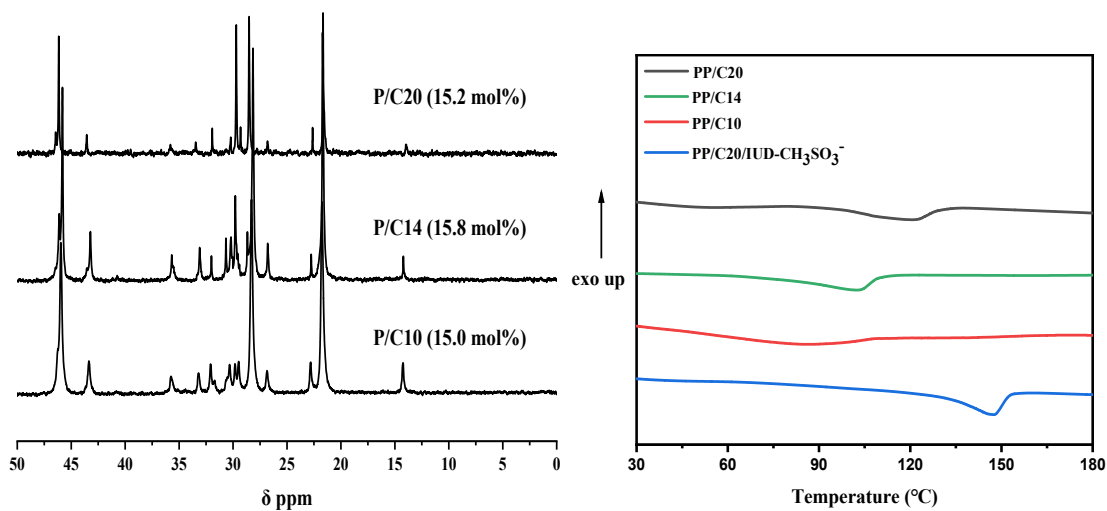

Figure S2.  $^{13}\text{C}$  NMR spectrum and DSC curves of PP/C10, PP/C14, PP/C20 and PP/C20/IUD- $\text{CH}_3\text{SO}_3^-$ .

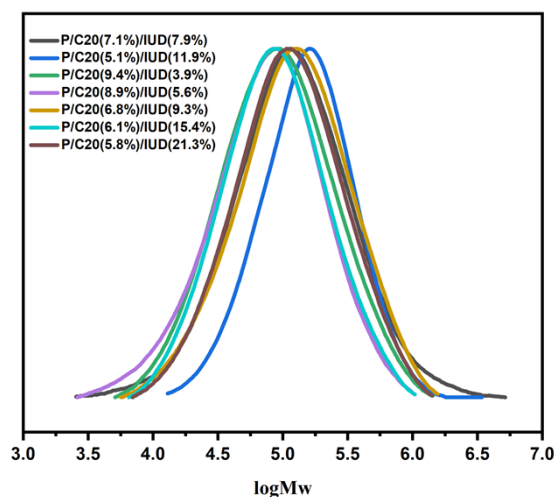

Figure S3. GPC elution curves of propylene/IUD/C20 copolymers with different compositions.

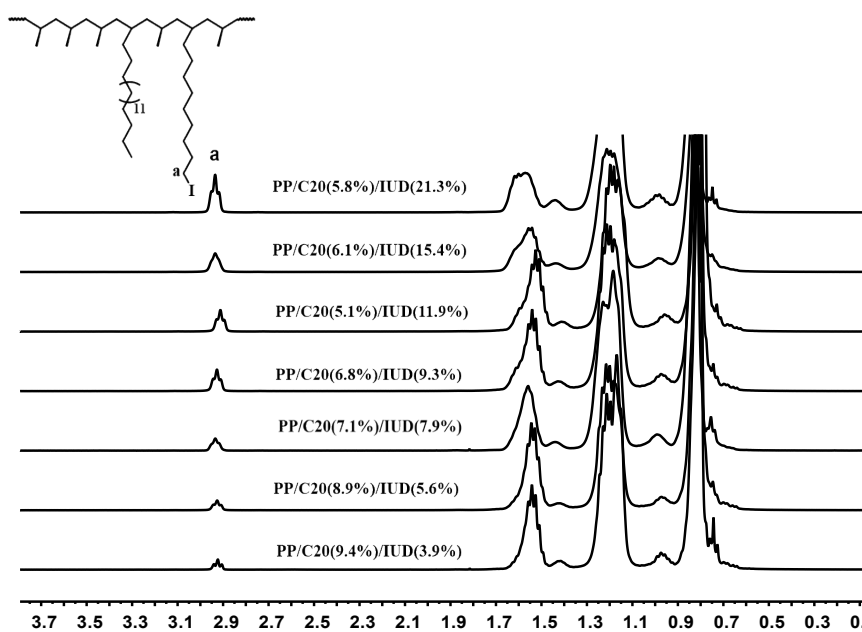

Figure S4.  $^1\text{H}$  NMR spectrum of propylene/IUD/C20 copolymers with different compositions.

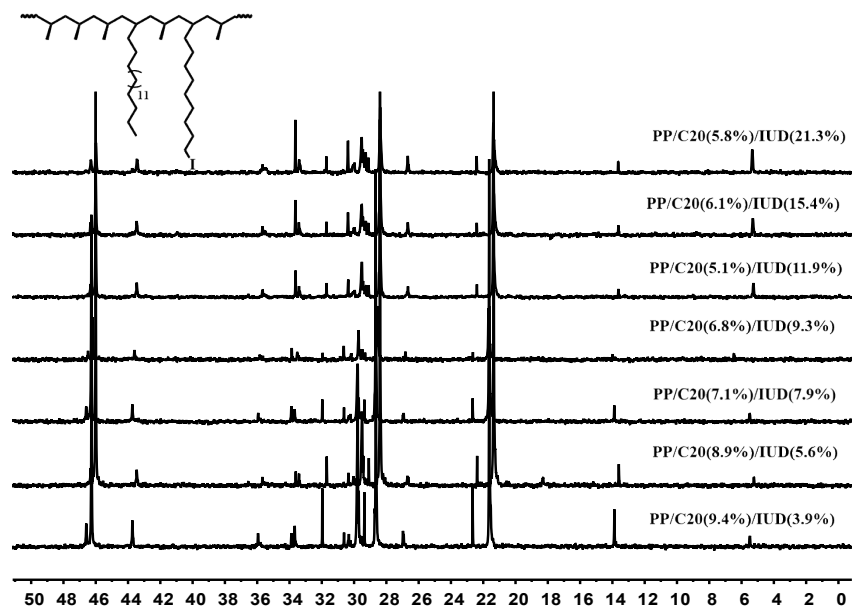

Figure S5. <sup>13</sup>C NMR spectrum of propylene/IUD/C20 copolymers with different compositions.

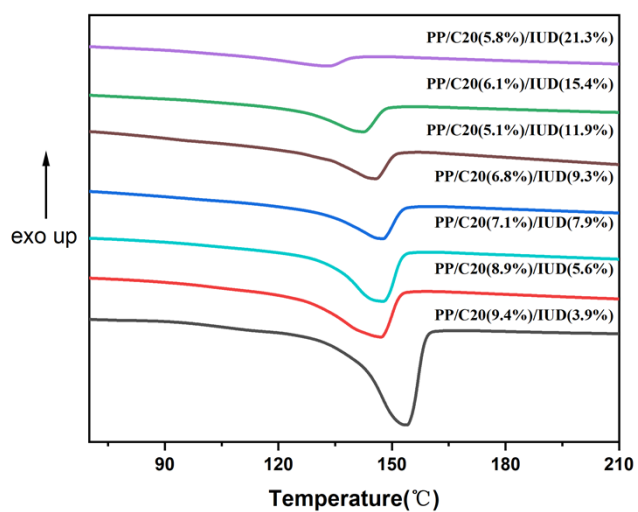

Figure S6. DSC curves of P/IUD/C20 copolymers with different compositions in the second heating process.

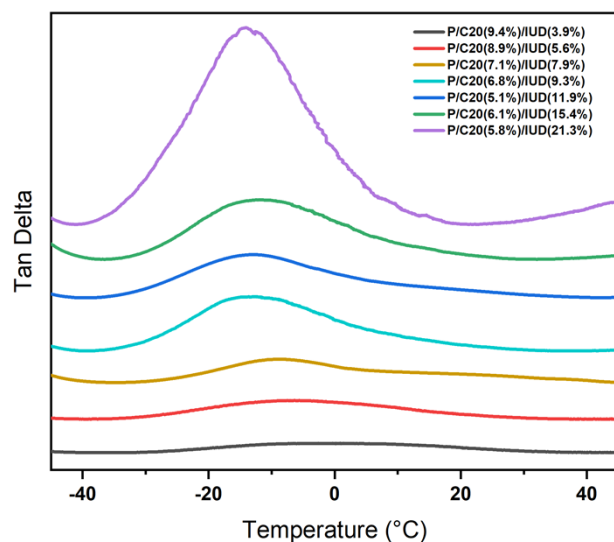

Figure S7. DMA curves of propylene/IUD/C20 copolymers with different compositions.

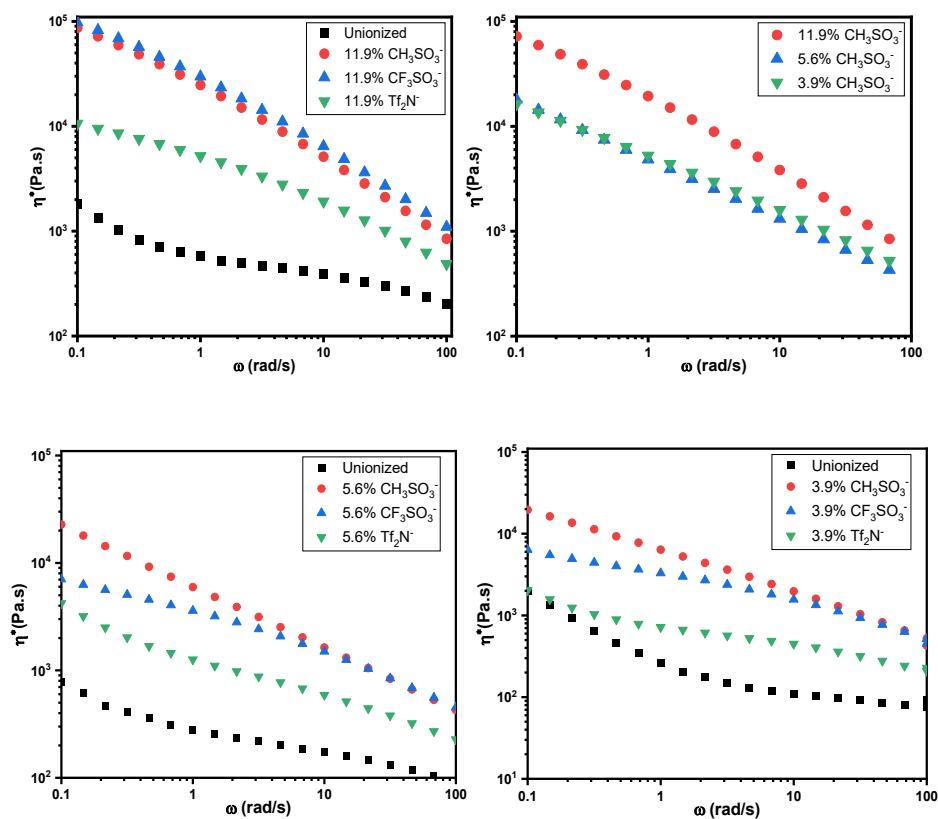

Figure S8. Complex viscosity ( $\eta^*$ ) of copolymers and ionomers plotted as functions of frequency for different ion contents at 180 °C.

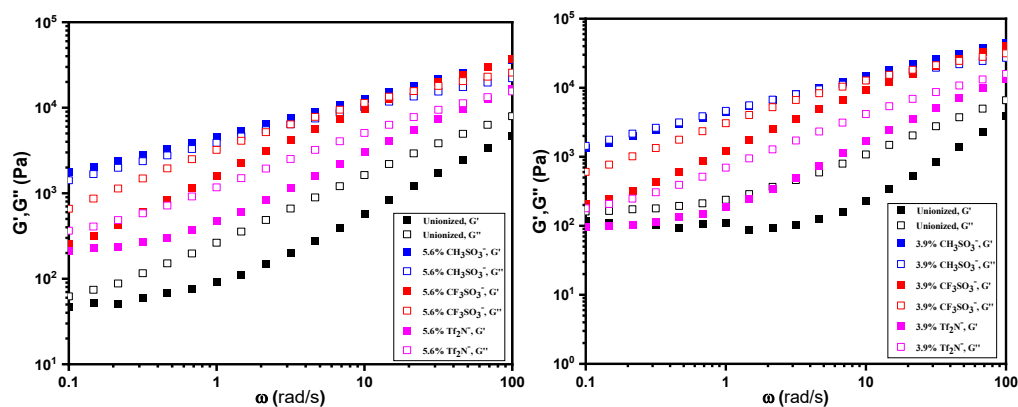

Figure S9. Storage modulus ( $G'$ ) and loss modulus ( $G''$ ) of copolymers and ionomers paired with different counteranions plotted as functions of frequency at 180 °C.

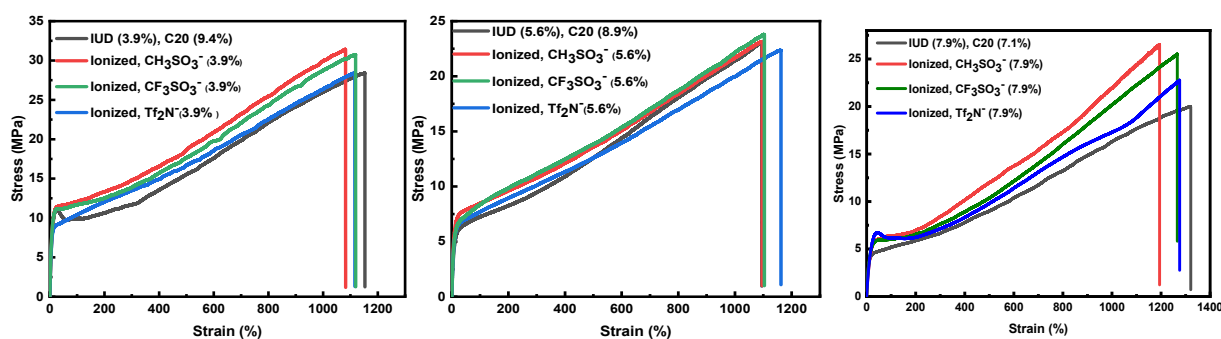

Figure S10. Stress-strain curves of unionized and ionized samples.

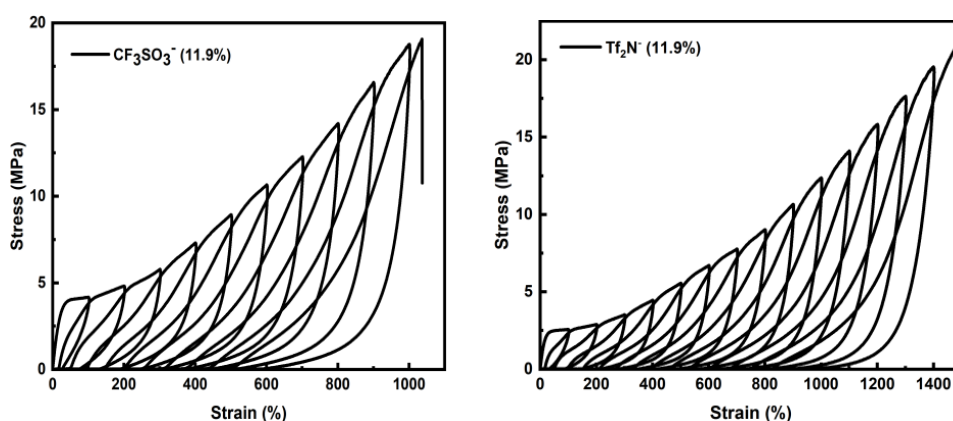

Figure S11. Plot of hysteresis experiment of propylene/IUD/C20 copolymer (11.9% IUD, 5.1% C20, SR=61.8%) and the corresponding ionomers with different counteranions (SR- $\text{CH}_3\text{SO}_3^-$ =70.4%, SR- $\text{CF}_3\text{SO}_3^-$ =68.6%, SR- $\text{Tf}_2\text{N}^-$ =62.3%).

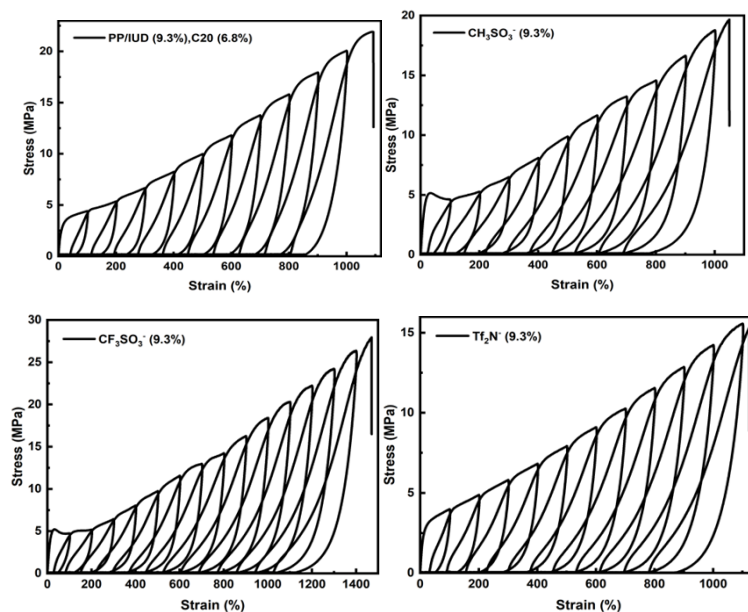

Figure S12. Plot of hysteresis experiment of propylene/IUD/C20 copolymer (9.3% IUD, 6.8% C20, SR=41.3%) and the corresponding ionomers with different counteranions (SR- $\text{CH}_3\text{SO}_3^-$ =50.8%, SR- $\text{CF}_3\text{SO}_3^-$ =51.6%, SR- $\text{Tf}_2\text{N}^-$ =44.7%).

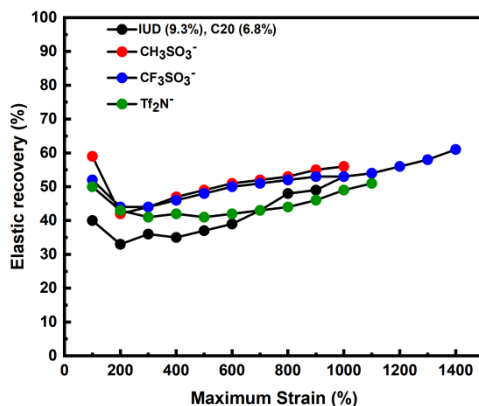

Figure S13. Elastic recovery (%) of unionized sample (9.3% IUD, 6.8% C20) and ionized samples with different counteranions (9.3% ion content).

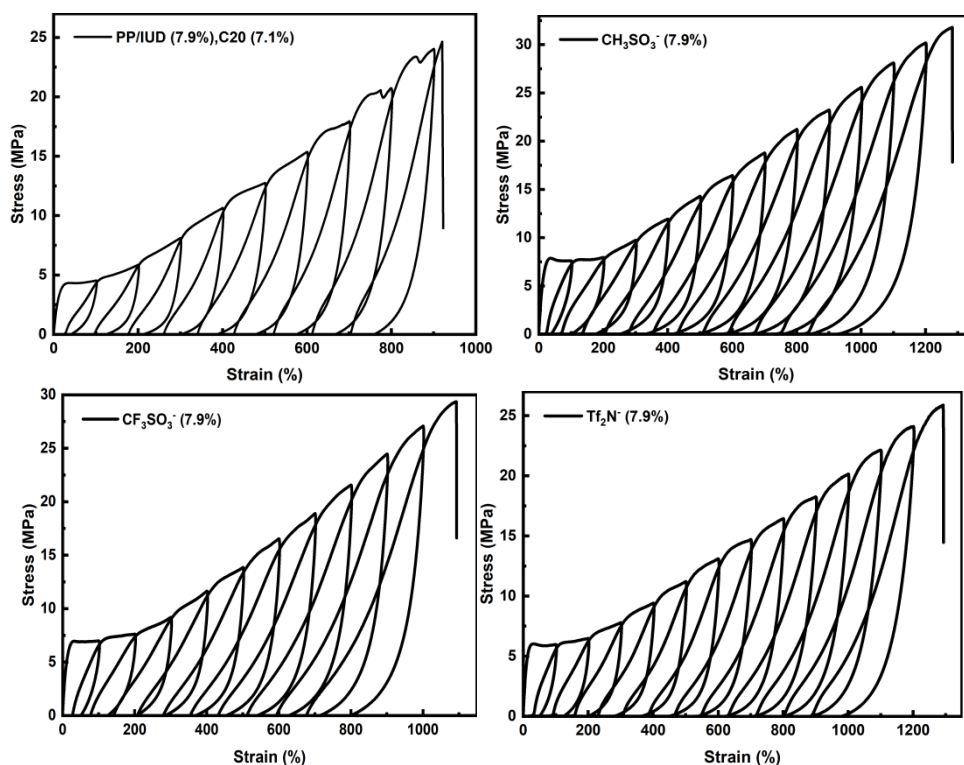

Figure S14. Plot of hysteresis experiment of propylene/IUD/C20 copolymer (7.9% IUD, 7.1% C20, SR=49.0%) and the corresponding ionomers with different counteranions (SR- $\text{CH}_3\text{SO}_3^-$  =56.6%, SR- $\text{CF}_3\text{SO}_3^-$  =56.2%, SR- $\text{Tf}_2\text{N}^-$  =52.3%).

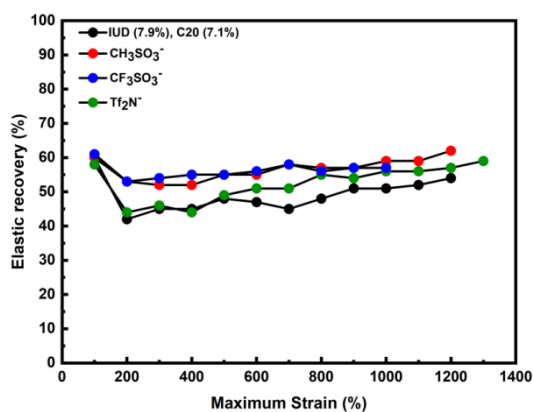

Figure S15. Elastic recovery (%) of unionized sample (7.9% IUD, 7.1% C20) and ionized samples with different counteranions (7.9% ion content).
